# Supplementary material for: Cuando me encuentro con el Capitán Garfio, no me engancho
Source: Oxford University Press journal article supplement (doi:10.1158/1078-0432.ccr-11-2947), 1983-01-01
Supplement: 10780432ccr112947-sup-tab1.xls [file 10780432ccr112947-sup-tab1.xls]

## Sheet: Sheet1
Supplementary Table S1. Clinicopathological features of the study subjects
		Total number	EML4-ALK (+)	EML4-ALK (–)
All cases		754	32	722
Sex
	Male	492	10	482
	Female	262	22	240
Age (years, mean ± SD)		64.8 ± 12.9	48.3 ± 15.9	65.5 ± 12.2	***
(Range)		(18 – 91)	(27 – 80)	(18 – 91)
EGFR mutation (718 analyzed)
	Positive	171	1	170
	Negative	547	31	516
Smoking history (pack-years) (679 analyzed)
	0	205	21	184
	1–19	68	6	62
	≥20	406	4	402
Histological subtypes
	Adenocarcinoma	524	32	492
	Squamous cell carcinoma	141	0	141
	Large cell carcinoma	9	0	9
	LCNEC	4	0	4
	Adenosquamous	5	0	5
	Other NSCLC	49	0	49
	Others (not defined yet)	22	0	22
LCNEC: large cell neuroendocrine carcinoma. **P = 0.002. ***P <0.001.
